# Supplementary material for: Molecular control of recombination dynamics in dye sensitised nanocrystalline TiO2 filmsElectronic supplementary information (ESI) available: synthesis and characterisation data for dye 2. See http://www.rsc.org/suppdata/cc/b2/b201855a/
Source: Royal Society of Chemistry journal article supplement (doi:10.1039/b201855a), 2002-05-09
Supplement: b201855a.doc [file b201855a.doc]

**Molecular control of recombination dynamics in dye sensitised nanocrystalline TiO2 films**

John N. Clifford, Gökhan Yahioglu, Lionel R. Milgrom and James R. Durrant*

Supplementary Information:

Dye **2** was prepared by first synthesising its ester analogue using the following method [1]. Methyl 4-formylbenzoate (1.008 gm, 6.1 mM) and 4-(diphenylamino) benzaldehyde (0.554 gm, 2.1 mM) were dissolved in propionic acid (400 ml) and brought to reflux. Pyrrole (0.5678 gm, 8.4 mM) was added and reflux continued for another 2 hours. After this, the propionic acid was removed under vacuum to leave a black solid. Thin layer chromatography showed the presence of at least 5 compounds which were then purified by column chromatography using silica gel and 70:30 chloroform : hexane as the eluting solvent. One of the bands from the column was the ester analogue of **2** which was then acidified by dissolving in a solution of tetrahydrofuran containing potassium hydroxide and left to stir for three days. Hydrochloric acid was added to this solution to neutralise the potassium hydroxide and sensitiser **2** was then extracted using ether. Ester form of dye **2**: MS FAB = 1174 (M+1); 1HNMR (380MHz, CDCl3); 9.01(pyrrolic- H, 6H), 8.99(pyrrolic-H, d, *J* = 4.75 Hz, 2H), 8.89(pyrrolic-H, d, *J* = 4.75 Hz, 2H), 8.45(phenyl-H, d, *J* = 8.01, 2H), 8.32(phenyl-H, d, *J* = 8.01, 2H), 8.07 (phenyl-H, m, 6H), 7.42(phenyl-H, m, 30H), 7.15(phenyl-H, m, 6H ), 4.12 (ester-H, s, 3H), -2.7 (NH, 2H). Dye **2**: MS FAB = 1160(M+1); 1HNMR (380MHz, CDCl3); 9.01(pyrrolic- H, m, 6H), 8.81 (pyrrolic-H, d, *J* = 4.75 Hz, 2H), 8.51 (pyrrolic-H, d, *J* = 8.01 Hz, 2H), 8.35(pyrrolic-H, d, *J* = 8.01 Hz, 2H), 8.07(phenyl-H, m, 6H), 7.40(phenyl-H, m, 30H), 7.14(phenyl-H, m, 6H),

-2.7 (NH, 2H).

[1] Milgrom, L. R.; O’ Neill, F. Tetrahedron **1995**, 51(7), 2137-44
